# Supplementary material for: Magnetic superexchange interactions: trinuclear bis(oxamidato) versus bis(oxamato) type complexes
Source: Royal Society of Chemistry journal article supplement (doi:10.1039/c4dt03579h), 2015-01-01
Supplement: c4dt03579h1.pdf [file c4dt03579h1.pdf]

## Supporting information

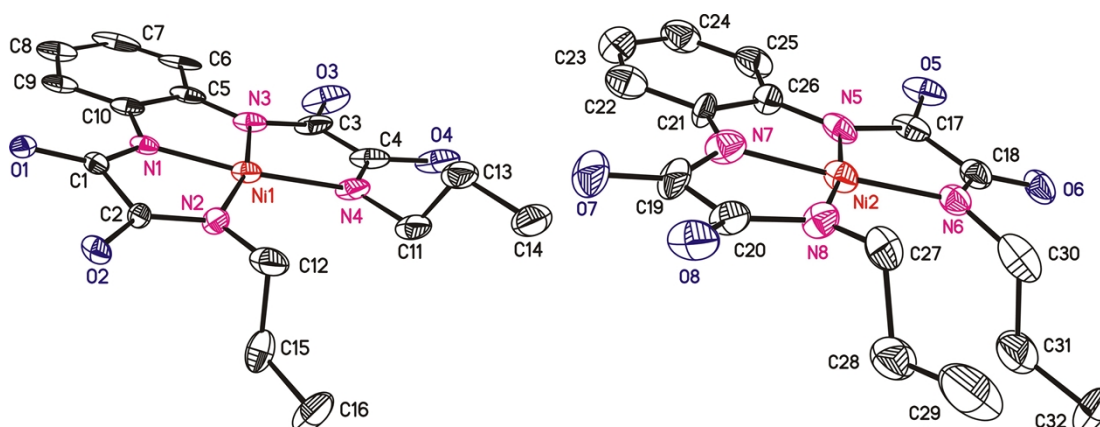

**Figure S1** ORTEP diagram (25 % ellipsoid probability) of the molecular structures of **6A** (left) and **6B** (right). All hydrogen atoms are omitted for clarity.

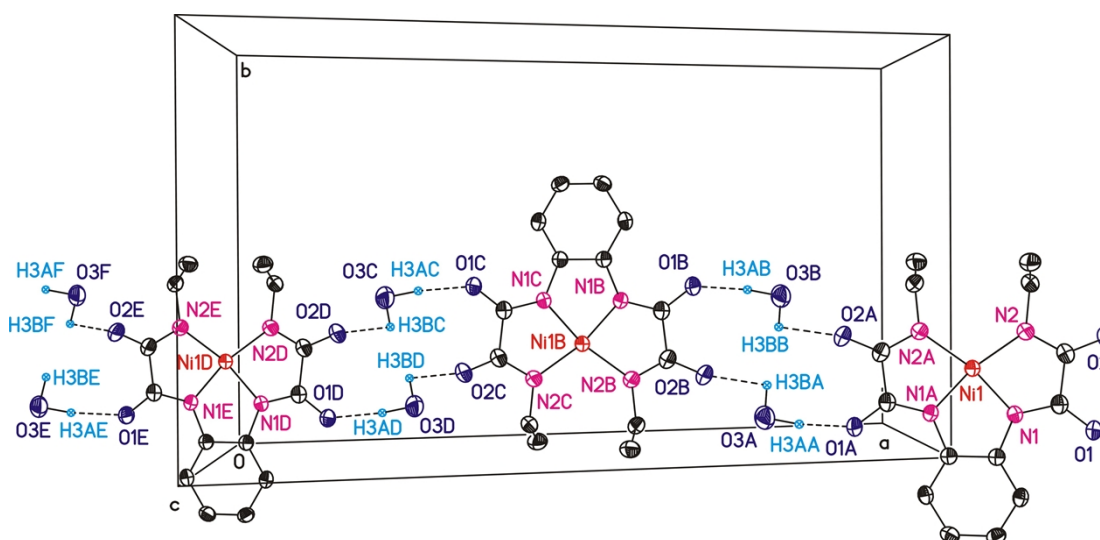

**Figure S2** Graphical illustration of a selected part of one 1D chain formed by **5\*** in the solid state due to formation of intermolecular hydrogen bonds. All  $[n\text{Bu}_4\text{N}]^+$  cations and C-bonded hydrogen atoms are omitted for clarity. Label “A” to “F” refers to atoms of a 1<sup>st</sup> to the 6<sup>th</sup> symmetry generated asymmetric unit of **5\***.

**Table S1** Selected bond lengths (Å) and angles (°) of the intermolecular hydrogen bonds of **5\***.

| D–H···A                  | D···A | D–H···A |
|--------------------------|-------|---------|
| O3–H3A···O1              | 2.833 | 133     |
| O3–H3B···O2 <sup>i</sup> | 2.974 | 109     |

Symmetry code: (i)  $\frac{1}{2} - x, \frac{1}{2} - y, 1 - z$ .

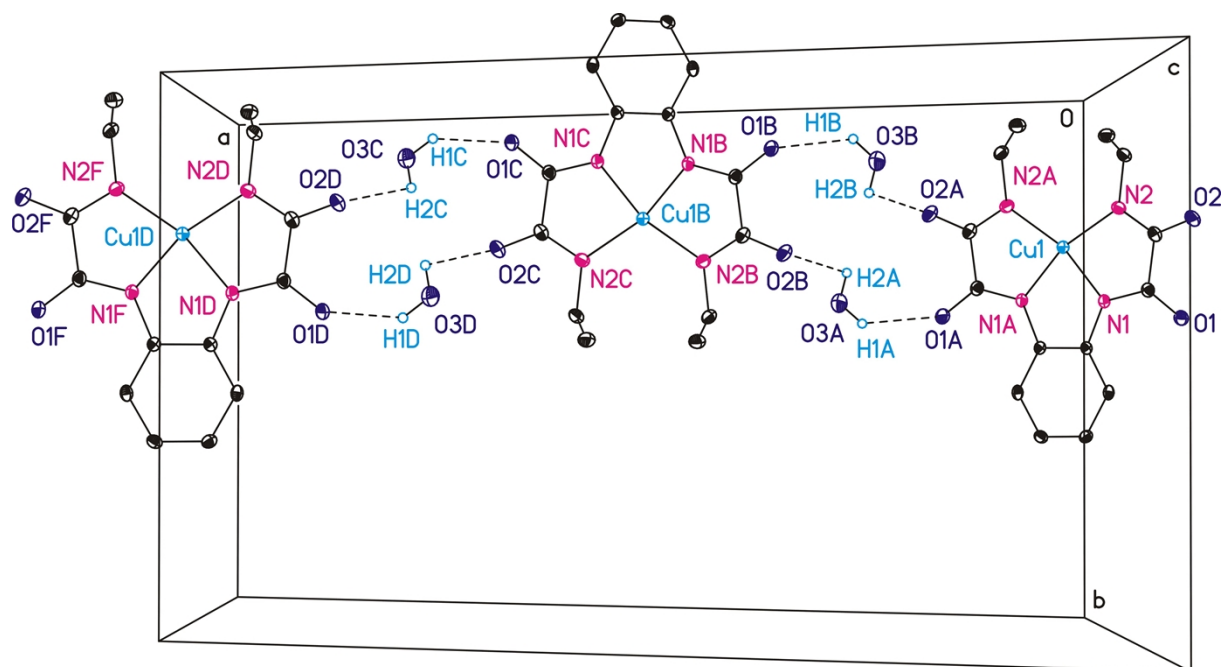

**Figure S3** Graphical illustration of a selected part of one 1D chain formed by **8'** in the solid state due to formation of intermolecular hydrogen bonds. All  $[\text{nBu}_4\text{N}]^+$  cations and C-bonded hydrogen atoms are omitted for clarity. Label "A" to "F" refers to atoms of a 1<sup>st</sup> to the 6<sup>th</sup> symmetry generated asymmetric unit of **8'**.

**Table S2** Selected bond lengths (Å) and angles (°) of the intermolecular hydrogen bonds of **8'**.

| D-H...A                 | D...A | D-H...A |
|-------------------------|-------|---------|
| O3-H1...O1              | 2.832 | 119     |
| O3-H2...O2 <sup>i</sup> | 2.992 | 135     |

Symmetry codes: (i)  $\frac{1}{2} - x, \frac{1}{2} - y, 1 - z$ .

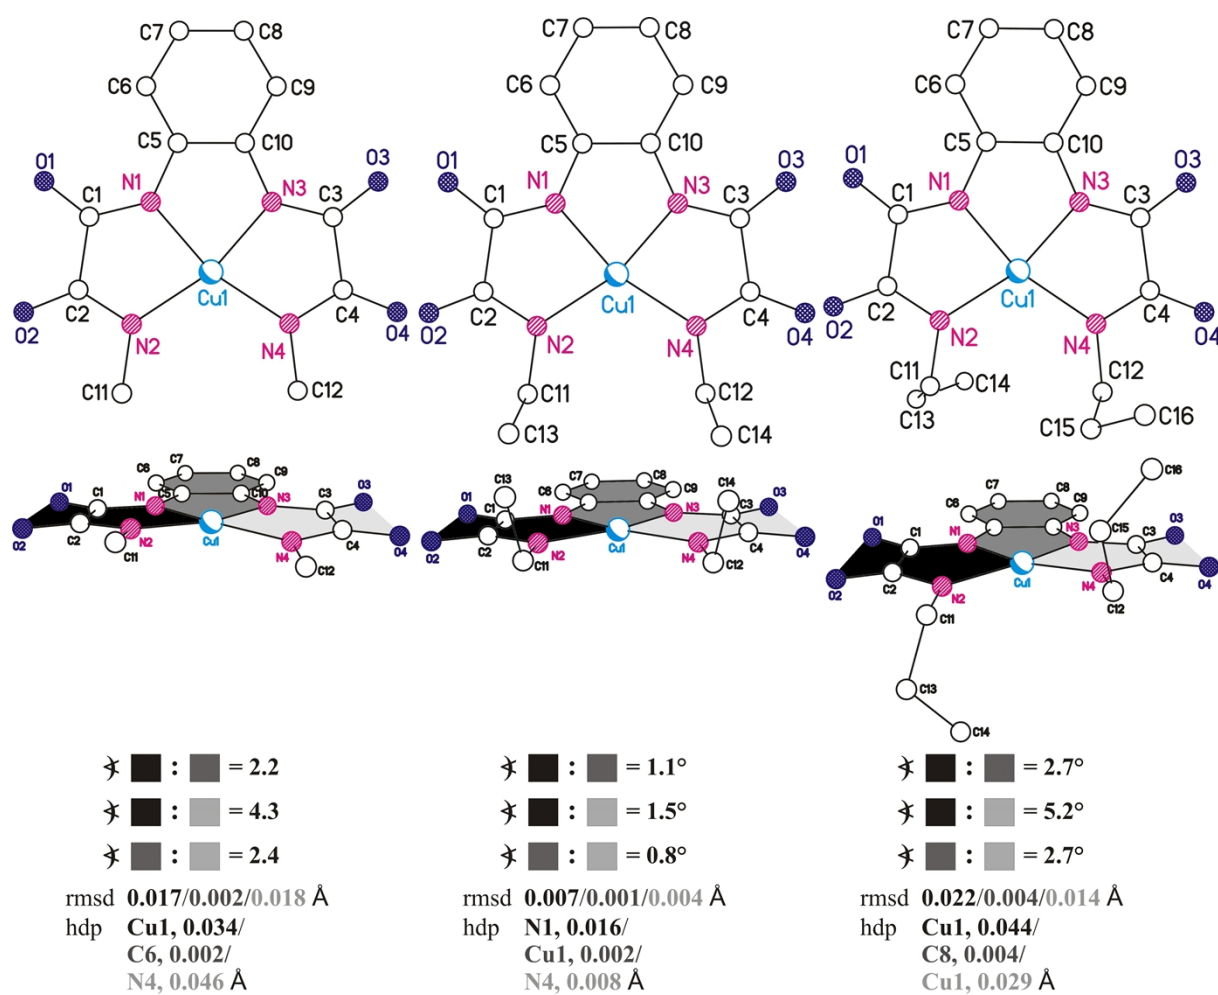

**Figure S4** Ball-and-stick models of the molecular structures of **7A<sup>calc</sup>**, **8A<sup>calc</sup>** and **9A<sup>calc</sup>** (left to right). Above: Top view. Below: Side view. All hydrogen atoms are omitted for clarity. The sign ⋈ refers to the interplanar angles.

**Table S3** Selected bond lengths (Å) and angles (°) of **7A–9A** and of the quantum chemically calculated related [Cu(opboR<sub>2</sub>)<sup>2-</sup> fragments denoted as **7A<sup>calc</sup>–9A<sup>calc</sup>**

|                     | <b>7A</b>  | <b>7A<sup>calc</sup></b> | <b>8A<sup>a</sup></b> | <b>8A<sup>calc</sup></b> | <b>9A</b> | <b>9A<sup>calc</sup></b> |
|---------------------|------------|--------------------------|-----------------------|--------------------------|-----------|--------------------------|
| <i>Bond lengths</i> |            |                          |                       |                          |           |                          |
| N1–Cu1              | 1.938(16)  | 1.970                    | 1.9372(17)            | 1.974                    | 1.934(6)  | 1.971                    |
| N2–Cu1              | 1.952(17)  | 2.001                    | 1.9643(18)            | 2.011                    | 1.967(7)  | 2.012                    |
| N3–Cu1              | 1.938(17)  | 1.971                    | 1.9372(17)            | 1.973                    | 1.936(7)  | 1.971                    |
| N4–Cu1              | 1.953(17)  | 2.001                    | 1.9643(18)            | 2.009                    | 1.942(7)  | 2.009                    |
| C1–O1               | 1.239(2)   | 1.235                    | 1.244(3)              | 1.234                    | 1.244(3)  | 1.234                    |
| C2–O2               | 1.251(2)   | 1.240                    | 1.258(3)              | 1.240                    | 1.240(7)  | 1.239                    |
| C3–O3               | 1.243(2)   | 1.235                    | 1.244(3)              | 1.234                    | 1.171(8)  | 1.234                    |
| C4–O4               | 1.250(3)   | 1.240                    | 1.258(3)              | 1.240                    | 1.312(10) | 1.239                    |
| C1–C2               | 1.545(3)   | 1.564                    | 1.551(3)              | 1.562                    | 1.561(11) | 1.563                    |
| C3–C4               | 1.548(3)   | 1.564                    | 1.551(3)              | 1.563                    | 1.559(14) | 1.565                    |
| <i>Bond angles</i>  |            |                          |                       |                          |           |                          |
| N1–Cu1–N3           | 82.20(7)   | 81.81                    | 81.95(10)             | 81.65                    | 80.8(3)   | 81.70                    |
| N2–Cu1–N4           | 111.18(7)  | 113.72                   | 112.37(11)            | 113.96                   | 111.9(3)  | 113.88                   |
| N1–Cu1–N2           | 83.30(7)   | 82.38                    | 83.05(7)              | 82.18                    | 83.2(3)   | 82.30                    |
| N3–Cu1–N4           | 83.50(7)   | 82.29                    | 83.05(7)              | 82.22                    | 84.2(3)   | 82.31                    |
| N1–Cu1–N4           | 165.23(7)  | 163.59                   | 164.03(7)             | 163.83                   | 164.9(3)  | 163.60                   |
| N2–Cu1–N3           | 165.05(7)  | 163.76                   | 164.03(7)             | 163.82                   | 163.9(3)  | 163.55                   |
| O1–C1–N1            | 128.7(2)   | 128.19                   | 128.4(2)              | 128.20                   | 128.2(10) | 128.26                   |
| O1–C1–C2            | 120.50(18) | 120.28                   | 120.23(18)            | 120.21                   | 121.1(6)  | 120.18                   |
| N1–C1–C2            | 110.79(18) | 111.52                   | 111.38(18)            | 111.60                   | 110.7(7)  | 111.56                   |
| O2–C2–N2            | 126.2(2)   | 125.65                   | 127.2(2)              | 125.91                   | 127.6(9)  | 125.87                   |
| O2–C2–C1            | 118.68(19) | 119.79                   | 118.5(2)              | 119.41                   | 117.4(7)  | 119.35                   |
| N2–C2–C1            | 115.10(18) | 114.55                   | 114.31(18)            | 114.68                   | 115.0(6)  | 114.78                   |
| O3–C3–N3            | 128.3(2)   | 128.18                   | 128.4(2)              | 128.22                   | 132.8(13) | 128.20                   |
| O3–C3–C4            | 120.31(19) | 120.28                   | 120.23(18)            | 120.18                   | 117.7(10) | 120.09                   |
| N3–C3–C4            | 111.42(18) | 111.54                   | 111.38(18)            | 111.59                   | 109.4(7)  | 111.71                   |
| O4–C4–N4            | 126.3(2)   | 125.79                   | 127.2(2)              | 125.94                   | 122.1(13) | 126.56                   |
| O4–C4–C3            | 119.0(2)   | 119.75                   | 118.5(2)              | 119.43                   | 122.0(8)  | 119.02                   |
| N4–C4–C3            | 114.74(18) | 114.46                   | 114.31(18)            | 114.63                   | 115.9(8)  | 114.42                   |

<sup>b</sup> For **8A** the labeling is as follows: N3 = N1A, C3 = C3A, O3 = O1A, N4 = N2A, C4 = C4A, O4 = O4A. Symmetry code "A": -x, y, -z + ½.

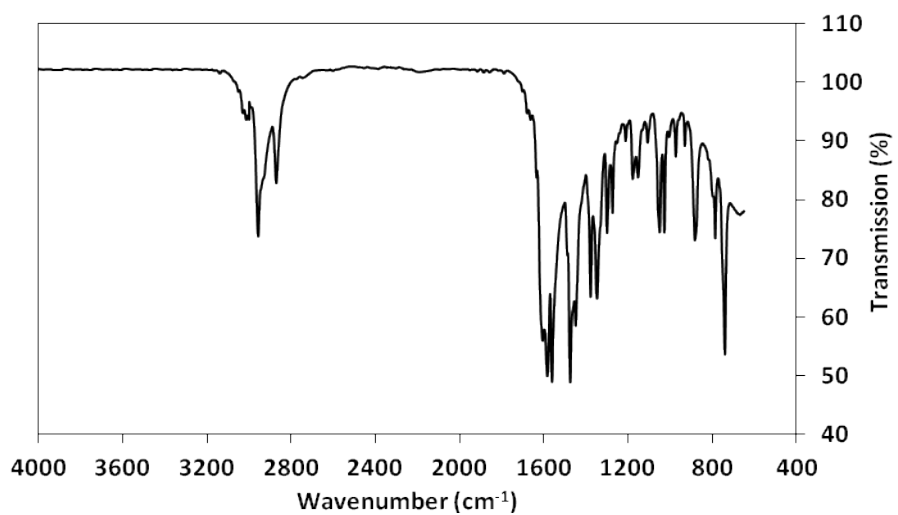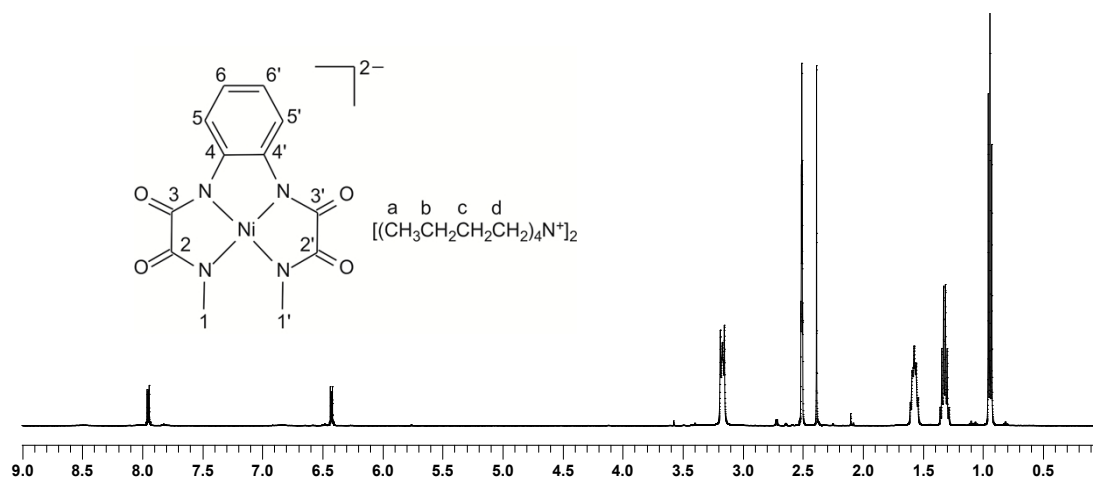

**Figure S5** IR (above) and  $^1\text{H}$  NMR (down) spectra of **4**

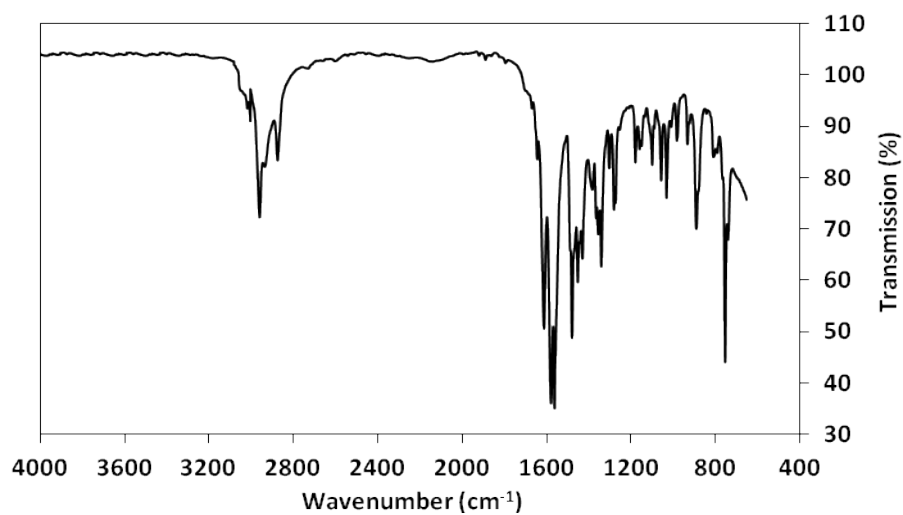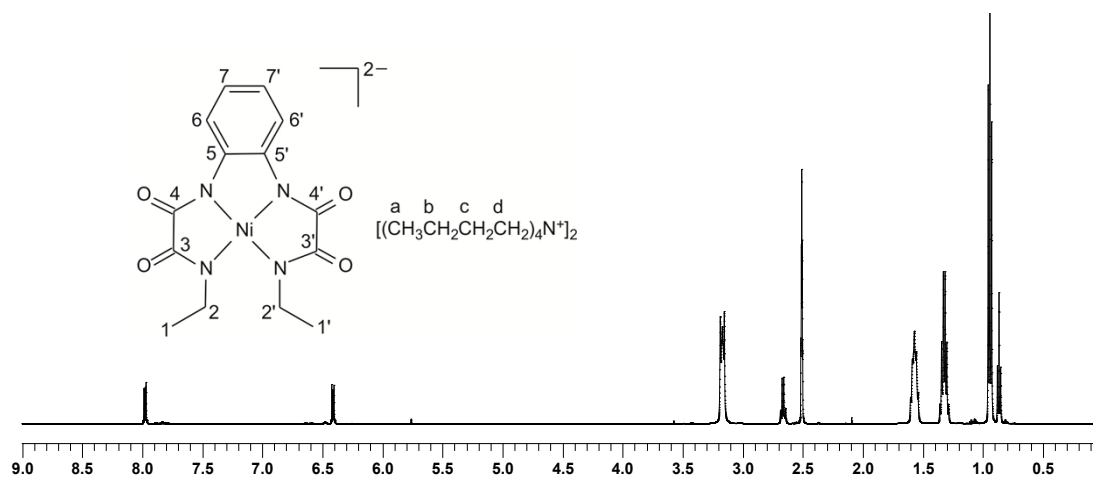

Figure S6 IR (above) and  $^1\text{H}$  NMR (down) spectra of 5

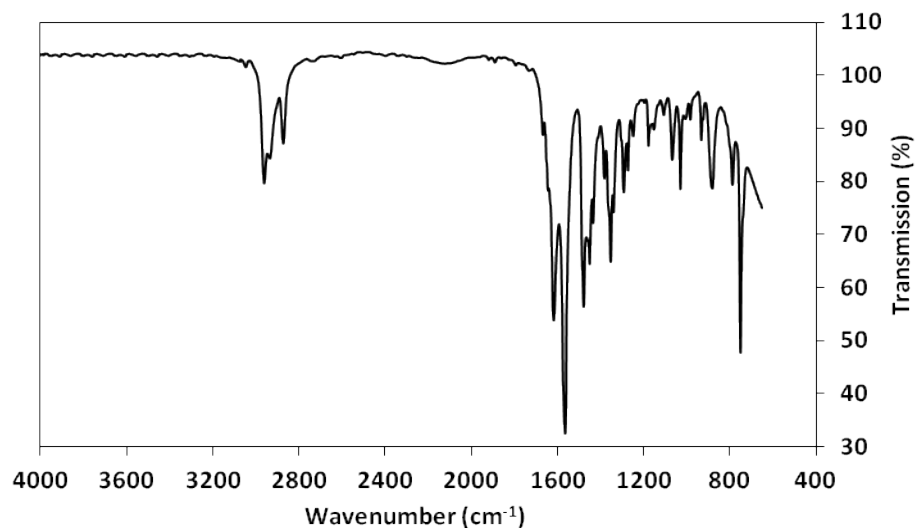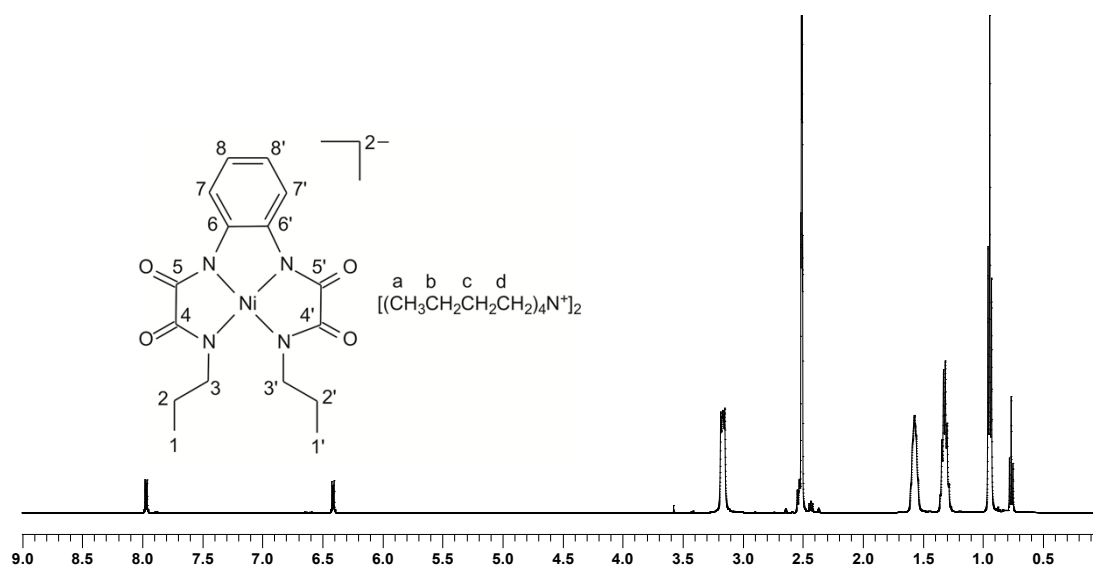

**Figure S7** IR (above) and <sup>1</sup>H NMR (down) spectra of **6**

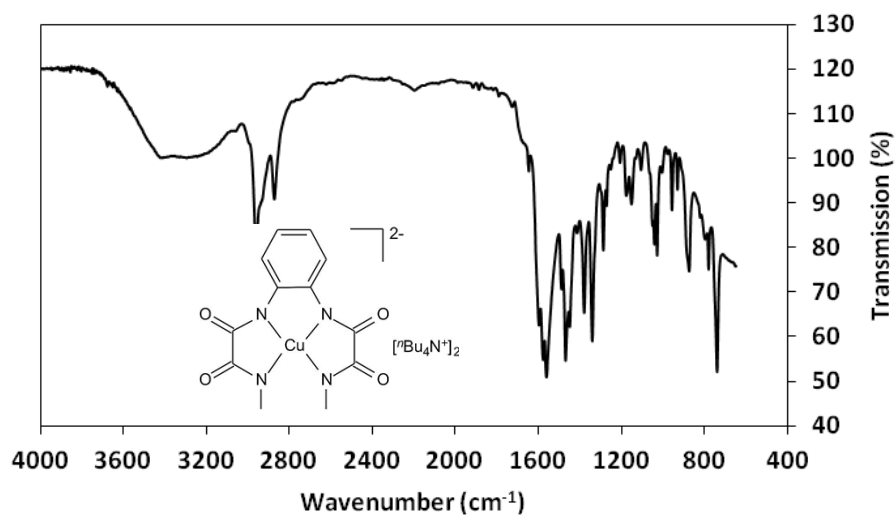

Figure S8 IR spectrum of 7

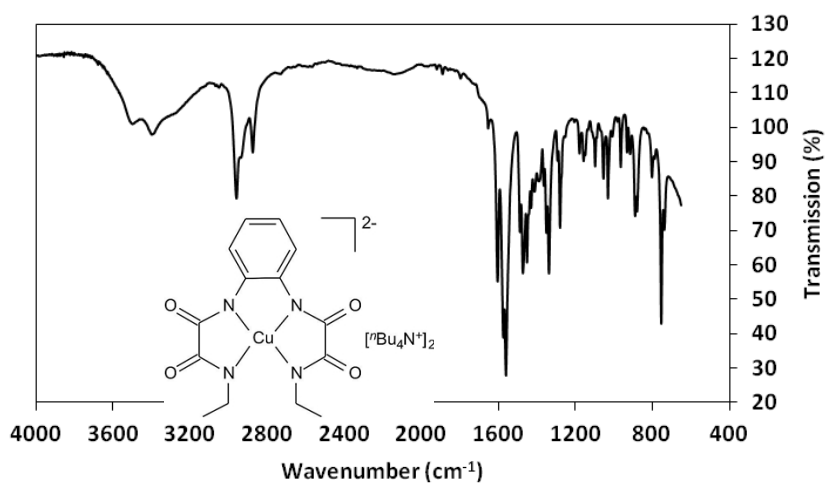

Figure S9 IR spectrum of 8

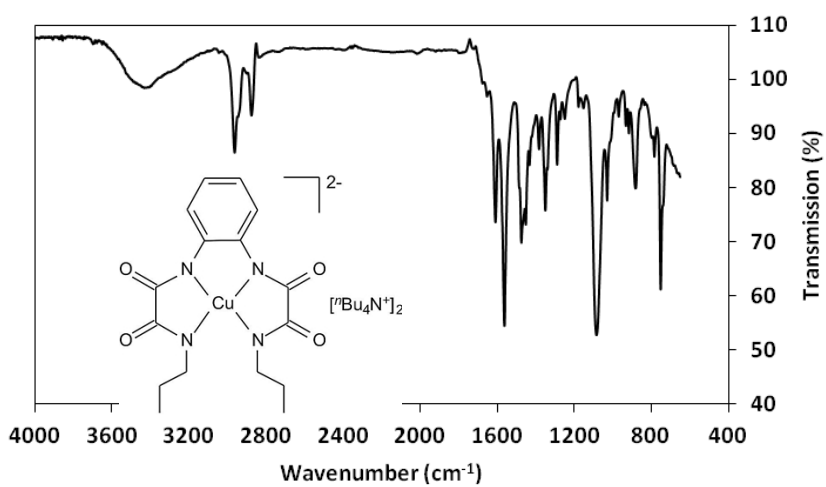

Figure S10 IR spectrum of 9



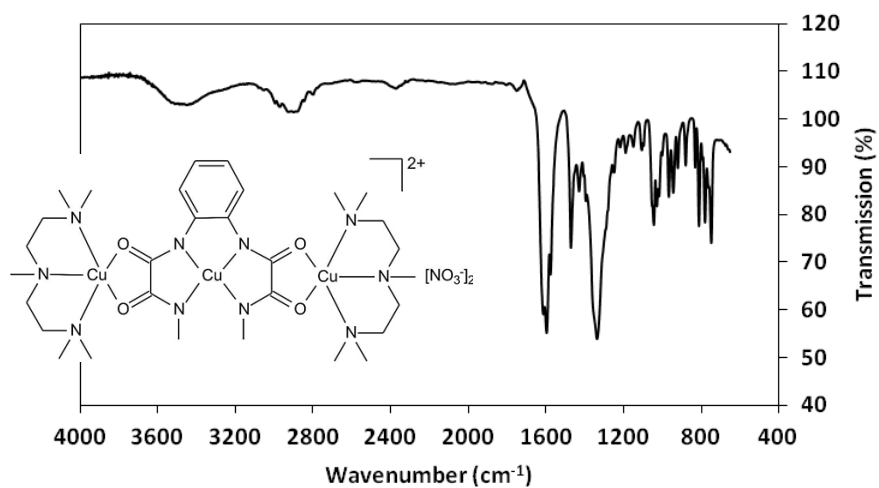

Figure S11 IR spectrum of 10

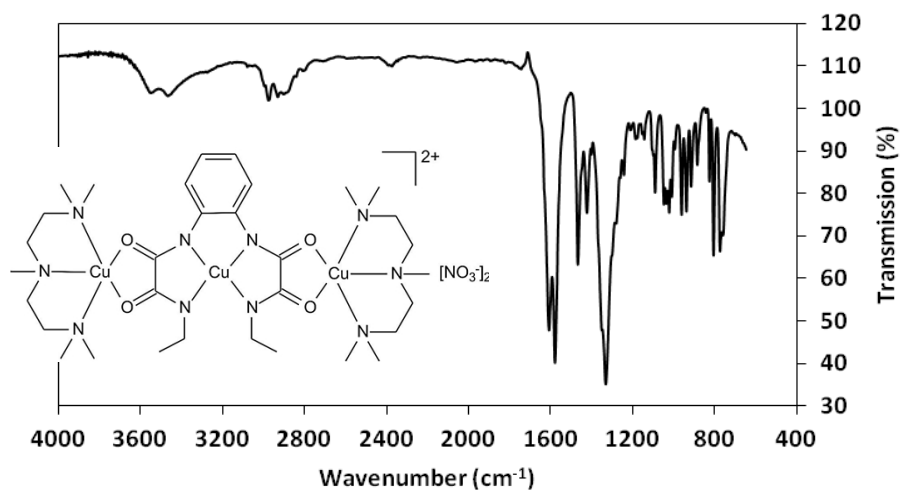

Figure S12 IR spectrum of 11

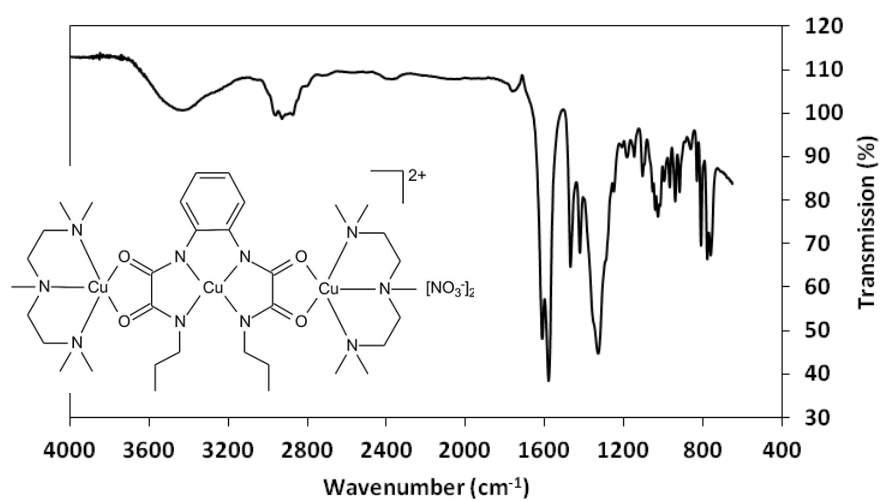

Figure S13 IR spectrum of 12
